# Supplementary material for: An extensive investigation of reactions involved in the nitrogen trifluoride dissociation
Source: Royal Society of Chemistry journal article supplement (doi:10.1039/c3nj00553d), 2013-01-01
Supplement: c3nj00553d.pdf [file c3nj00553d.pdf]

## An extensive investigation of Reactions Involved in the Nitrogen Trifluoride Dissociation

Simone S. Ramalho<sup>‡</sup>, Wiliam F. da Cunha<sup>†</sup>, Alessandra F. Albernaz<sup>†</sup>,  
Pedro H. O. Neto<sup>†</sup>, Geraldo Magela e Silva<sup>†</sup>, and Ricardo Gargano<sup>†</sup>  
<sup>‡</sup> *Goiás Federal Institute of Education, Science and Technology, Brazil and*  
<sup>†</sup> *Institute of Physics, University of Brasilia, Brasilia, 70.919-970, Brazil*  
(Dated: May 22, 2013)

---

<sup>1</sup> P. R. P. Barreto, A. F. A. Vilela, R. Gargano, *Int. J. Quantum Chem.*, 2005, **103** 659.

TABLE I: Total electronic energies(hartree), forward barrier( $V_f + d\varepsilon_{ZPE}$ ), reverse barrier( $V_r + d\varepsilon_{ZPE}$ ), and enthalpy with ZPE correction( $\Delta H + d\varepsilon_{ZPE}$ ) and experimental heat of reaction ( $\Delta_f H^0(\text{exp})$ ) values, given in kcal mol<sup>-1</sup>, using Dunning basis set for reactant, product and TS for  $\text{NF}_3 + \text{F} = \text{NF}_2 + \text{F}_2$  reaction.

|                       | $\text{NF}_3 + \text{F}$ | $\text{TS}$  | $\text{NF}_2 + \text{F}_2$ | $V_f + d\varepsilon_{ZPE}$ | $V_r + d\varepsilon_{ZPE}$ | $\Delta H + d\varepsilon_{ZPE}$ |
|-----------------------|--------------------------|--------------|----------------------------|----------------------------|----------------------------|---------------------------------|
| MP2/cc-pVDZ           | -452.8164999             | -452.7238979 | -452.7786090               | 55.8130                    | 33.2888                    | 22.5242                         |
| MP2/aug-cc-pVDZ       | -452.9343944             | -452.8313556 | -452.8916510               | 62.3622                    | 36.7930                    | 25.5692                         |
| MP2/cc-pVTZ           | -453.3114885             | -453.2069447 | -453.2725274               | 63.3066                    | 40.1109                    | 23.1958                         |
| MP2/aug-cc-pVTZ       | -453.3570794             | -453.2510599 | -453.3172341               | 64.2326                    | 40.4820                    | 23.7506                         |
| MP4(SDTQ)/cc-pVDZ     | -452.8615325             | -452.7805737 | -452.8256230               | 48.5068                    | 27.2260                    | 21.2809                         |
| MP4(SDTQ)/aug-cc-pVDZ | -452.9894745             | -452.9006373 | -452.9487486               | 53.4506                    | 29.1474                    | 24.3032                         |
| MP4(SDTQ)/cc-pVTZ     | -453.3717335             | -453.2792837 | -453.3348592               | 55.7175                    | 33.8312                    | 21.8863                         |
| MP4(SDTQ)/aug-cc-pVTZ | -453.4218449             |              | -453.3841565               |                            |                            | 22.3971                         |
| QCISD(T)/cc-pVDZ      | -452.8589287             | -452.8195527 | -452.8258868               | 22.4132                    | 2.9318                     | 19.4814                         |
| QCISD(T)/aug-cc-pVDZ  | -452.9849417             |              | -452.9457505               |                            |                            | 23.3402                         |
| QCISD(T)/cc-pVTZ      | -453.3649491             |              | -453.3297451               |                            |                            | 20.8381                         |
| QCISD(T)/aug-cc-pVTZ  | -453.4141924             |              | -453.3776506               |                            |                            | 21.6776                         |
| CCSD(T)/cc-pVDZ       | -452.8575819             | -452.8175282 | -452.8245663               | 22.8385                    | 3.3736                     | 19.4649                         |
| CCSD(T)/aug-cc-pVDZ   | -452.9830006             |              | -452.9438843               |                            |                            | 23.2931                         |
| CCSD(T)/cc-pVTZ       | -453.3630415             |              | -453.3277174               |                            |                            | 20.9135                         |
| CCSD(T)/aug-cc-pVTZ   | -453.4120261             |              | -453.3753723               |                            |                            | 21.7479                         |
| $d\varepsilon_{ZPE}$  | 6.3256                   | 4.0300       | 5.0729                     |                            |                            | -1.2527                         |

TABLE II: Total electronic energies(hartree), forward barrier( $V_f + d\varepsilon_{ZPE}$ ), reverse barrier( $V_r + d\varepsilon_{ZPE}$ ), and enthalpy with ZPE correction( $\Delta H + d\varepsilon_{ZPE}$ ) and experimental heat of reaction ( $\Delta_f H^0(\text{exp})$ ) values, given in kcal mol<sup>-1</sup>, using Pople basis set for reactant, product and TS for  $\text{NF}_3 + \text{F} = \text{NF}_2 + \text{F}_2$  reaction.

|                              | $\text{NF}_3 + \text{F}$ | $\text{TS}$  | $\text{NF}_2 + \text{F}_2$ | $V_f + d\varepsilon_{ZPE}$ | $V_r + d\varepsilon_{ZPE}$ | $\Delta H + d\varepsilon_{ZPE}$ |
|------------------------------|--------------------------|--------------|----------------------------|----------------------------|----------------------------|---------------------------------|
| MP2/6-31G(d)                 | -452.7158157             | -452.6283527 | -452.6816125               | 52.9515                    | 32.6692                    | 20.2823                         |
| MP2/6-31++G(d,p)             | -452.7719942             | -452.6716458 | -452.7323849               | 61.0372                    | 37.3626                    | 23.6746                         |
| MP2/6-311++G(d,p)            | -453.1010575             | -453.0022258 | -453.0582130               | 60.0855                    | 34.3807                    | 25.7048                         |
| MP2/6-311++G(df,pd)          | -453.2204930             | -453.1149061 | -453.1748885               | 64.3244                    | 36.8877                    | 27.4367                         |
| MP2/6-311++G(3df,3pd)        | -453.3576485             | -453.2499220 | -453.3150530               | 65.6670                    | 40.1185                    | 25.5485                         |
| MP4(SDTQ)/6-31G(d)           | -452.7707988             | -452.6845549 | -452.7347373               | 52.1865                    | 30.7381                    | 21.4484                         |
| MP4(SDTQ)/6-31++G(d,p)       | -452.8204531             | -452.7316474 | -452.7810884               | 53.7941                    | 30.2729                    | 23.5212                         |
| MP4(SDTQ)/6-311++G(d,p)      | -453.1532972             |              | -453.1128127               |                            |                            | 24.2238                         |
| MP4(SDTQ)/6-311++G(df,pd)    | -453.2805706             |              | -453.2374394               |                            |                            | 25.8847                         |
| MP4(SDTQ)/6-311++G(3df,3pd)  | -453.4242297             |              | -453.3836737               |                            |                            | 24.2687                         |
| QCISD(T)/6-31G(d)            | -452.7670276             |              | -452.7336563               |                            |                            | 19.7602                         |
| QCISD(T)/6-31++G(d,p)        | -452.8152703             |              | -452.7776288               |                            |                            | 22.4398                         |
| QCISD(T)/6-311++G(d,p)       | -453.1488963             |              | -453.1099966               |                            |                            | 23.2294                         |
| QCISD(T)/6-311++G(df,pd)     | -453.2752299             |              | -453.2340658               |                            |                            | 24.6503                         |
| CCSD(T)/6-31G(d)             | -452.7653505             |              | -452.7321047               |                            |                            | 19.6815                         |
| CCSD(T)/6-31++G(d,p)         | -452.8131630             |              | -452.7756542               |                            |                            | 22.3566                         |
| CCSD(T)/6-311++G(d,p)        | -453.1468068             |              | -453.1077868               |                            |                            | 23.3049                         |
| CCSD(T)/6-311++G(df,pd)      | -453.2732259             |              | -453.2319374               |                            |                            | 24.7284                         |
| $d\varepsilon_{ZPE}$         | 6.3513                   | 4.4190       | 5.1708                     |                            |                            | -1.1806                         |
| $\Delta_f H^0(\text{exp})^1$ | -11.733                  |              | 8.300                      |                            |                            | 20.033                          |

TABLE III: Total electronic energies(hartree), forward barrier( $V_f + d\varepsilon_{ZPE}$ ), reverse barrier( $V_r + d\varepsilon_{ZPE}$ ), and enthalpy with ZPE correction( $\Delta H + d\varepsilon_{ZPE}$ ) and experimental heat of reaction ( $\Delta_f H^0(\text{exp})$ ) values, given in kcal mol<sup>-1</sup>, using Dunning and Pople basis set for reactant, product and TS for  $\text{NF}_3 + \text{F} = \text{NF}_3 + \text{F}$  reaction.

|                              | $\text{NF}_3 + \text{F}$ | $\text{TS}$  | $\text{NF}_3 + \text{F}$ | $V_f + d\varepsilon_{ZPE}$ | $V_r + d\varepsilon_{ZPE}$ | $\Delta H + d\varepsilon_{ZPE}$ |
|------------------------------|--------------------------|--------------|--------------------------|----------------------------|----------------------------|---------------------------------|
| MP2/cc-pVDZ                  | -452.8164999             | -452.7654434 | -452.8164999             | 32.6894                    | 32.6894                    | 0.0000                          |
| MP2/aug-cc-pVDZ              | -452.9343944             | -452.8935552 | -452.9343944             | 26.2780                    | 26.2780                    | 0.0000                          |
| MP2/cc-pVTZ                  | -453.3114885             | -453.2720529 | -453.3114885             | 25.3972                    | 25.3972                    | 0.0000                          |
| MP2/aug-cc-pVTZ              | -453.3570794             | -453.3230592 | -453.3570794             | 21.9990                    | 21.9990                    | 0.0000                          |
| MP4(SDTQ)/cc-pVDZ            | -452.8615325             | -452.8129134 | -452.8615325             | 31.1599                    | 31.1599                    | 0.0000                          |
| MP4(SDTQ)/aug-cc-pVDZ        | -452.9894745             | -452.9531076 | -452.9894745             | 23.4716                    | 23.4716                    | 0.0000                          |
| MP4(SDTQ)/cc-pVTZ            | -453.3717335             | -453.2713335 | -453.3717335             | 63.6530                    | 63.6529                    | 0.0000                          |
| MP4(SDTQ)/aug-cc-pVTZ        | -453.4218449             |              | -453.4218449             |                            |                            | 0.0000                          |
| QCISD(T)/cc-pVDZ             | -452.8589287             | -452.8199164 | -452.8589287             | 25.1316                    | 25.1316                    | 0.0000                          |
| QCISD(T)/aug-cc-pVDZ         | -452.9849417             | -452.9575320 | -452.9849417             | 17.8508                    | 17.8508                    | 0.0000                          |
| QCISD(T)/cc-pVTZ             | -453.3649491             |              | -453.3649491             |                            |                            | 0.0000                          |
| QCISD(T)/aug-cc-pVTZ         | -453.4141924             |              | -453.4141924             |                            |                            | 0.0000                          |
| CCSD(T)/cc-pVDZ              | -452.8575819             | -452.8176296 | -452.8575819             | 25.7214                    | 25.7214                    | 0.0000                          |
| CCSD(T)/aug-cc-pVDZ          | -452.9830006             |              | -452.9830006             |                            |                            | 0.0000                          |
| CCSD(T)/cc-pVTZ              | -453.3630415             |              | -453.3630415             |                            |                            | 0.0000                          |
| CCSD(T)/aug-cc-pVTZ          | -453.4120261             |              | -453.4120261             |                            |                            | 0.0000                          |
| $d\varepsilon_{ZPE}$         | 6.3256                   | 6.9766       | 6.3256                   |                            |                            | 0.0000                          |
| MP2/6-31G(d)                 | -452.7158157             | -452.6841477 | -452.7158157             | 20.8651                    | 20.8651                    | 0.0000                          |
| MP2/6-31++G(d,p)             | -452.7719942             | -452.7298857 | -452.7719942             | 27.4166                    | 27.4166                    | 0.0000                          |
| MP2/6-311++G(d,p)            | -453.1010575             | -453.0529974 | -453.1010575             | 31.1513                    | 31.1513                    | 0.0000                          |
| MP2/6-311++G(df,pd)          | -453.2204930             | -453.1769466 | -453.2204930             | 28.3189                    | 28.3189                    | 0.0000                          |
| MP2/6-311++G(3df,3pd)        | -453.3576485             | -453.3213460 | -453.3576485             | 23.7733                    | 23.7733                    | 0.0000                          |
| MP4(SDTQ)/6-31G(d)           | -452.7707988             | -452.7310447 | -452.7707988             | 25.9392                    | 25.9392                    | 0.0000                          |
| MP4(SDTQ)/6-31++G(d,p)       | -452.8204531             | -452.7808896 | -452.8204531             | 25.8196                    | 25.8196                    | 0.0000                          |
| MP4(SDTQ)/6-311++G(d,p)      | -453.1532972             | -453.1088523 | -453.1532972             | 28.8827                    | 28.8827                    | 0.0000                          |
| MP4(SDTQ)/6-311++G(df,pd)    | -453.2805706             | -453.2408221 | -453.2805706             | 25.9357                    | 25.9357                    | 0.0000                          |
| MP4(SDTQ)/6-311++G(3df,3pd)  | -453.4242297             |              | -453.4242297             |                            |                            | 0.0000                          |
| QCISD(T)/6-31G(d)            | -452.7670276             | -452.7356302 | -452.7670276             | 20.6953                    | 20.6953                    | 0.0000                          |
| QCISD(T)/6-31++G(d,p)        | -452.8152703             | -452.7841483 | -452.8152703             | 20.5225                    | 20.5225                    | 0.0000                          |
| QCISD(T)/6-311++G(d,p)       | -453.1488963             | -453.1137090 | -453.1488963             | 23.0735                    | 23.0735                    | 0.0000                          |
| QCISD(T)/6-311++G(df,pd)     | -453.2752299             |              | -453.2752299             |                            |                            | 0.0000                          |
| CCSD(T)/6-31G(d)             | -452.7653505             | -452.7330607 | -452.7653505             | 21.2553                    | 21.2553                    | 0.0000                          |
| CCSD(T)/6-31++G(d,p)         | -452.8131630             | -452.7810081 | -452.8131630             | 21.1707                    | 21.1706                    | 0.0000                          |
| CCSD(T)/6-311++G(d,p)        | -453.1468068             | -453.1104789 | -453.1468068             | 23.7892                    | 23.7892                    | 0.0000                          |
| CCSD(T)/6-311++G(df,pd)      | -453.2732259             |              | -453.2732259             |                            |                            | 0.0000                          |
| $d\varepsilon_{ZPE}$         | 6.3513                   | 7.3445       | 6.3513                   |                            |                            | 0.0000                          |
| $\Delta_f H^0(\text{exp})^1$ | -11.733                  |              | -11.733                  |                            |                            | 0.000                           |

TABLE IV: Total electronic energies(hartree), forward barrier( $V_f + d\varepsilon_{ZPE}$ ), reverse barrier( $V_r + d\varepsilon_{ZPE}$ ), and enthalpy with ZPE correction( $\Delta H + d\varepsilon_{ZPE}$ ) and experimental heat of reaction ( $\Delta_f H^0(\text{exp})$ ) values, given in kcal mol<sup>-1</sup>, using Dunning and Pople basis set for reactant, product and TS for  $N_2F = N_2 + F$  reaction.

|                              | $N_2F$       | $TS_{10}$    | $N_2 + F$    | $V_d + d\varepsilon_{ZPE}$ | $V_r + d\varepsilon_{ZPE}$ | $\Delta H + d\varepsilon_{ZPE}$ |
|------------------------------|--------------|--------------|--------------|----------------------------|----------------------------|---------------------------------|
| MP2/cc-pVDZ                  | -208.5517426 | -208.5337965 | -208.7849231 | 10.5746                    | 158.2398                   | -147.6652                       |
| MP2/aug-cc-pVDZ              | -208.6027351 | -208.5835283 | -208.8230135 | 11.3657                    | 150.9347                   | -139.5690                       |
| MP2/cc-pVTZ                  | -208.7792194 | -208.7595070 | -208.9998415 | 11.6830                    | 151.4676                   | -139.7847                       |
| MP2/aug-cc-pVTZ              | -208.8020345 | -208.7827424 | -209.0182104 | 11.4192                    | 148.4139                   | -136.9947                       |
| MP4(SDTQ)/cc-pVDZ            | -208.5949819 | -208.5772704 | -208.8135452 | 10.4274                    | 148.9201                   | -138.4928                       |
| MP4(SDTQ)/aug-cc-pVDZ        | -208.6508216 | -208.6318322 | -208.8555815 | 11.2293                    | 141.0603                   | -129.8310                       |
| MP4(SDTQ)/cc-pVTZ            | -208.8301623 | -208.8106211 | -209.0372541 | 11.5755                    | 142.8698                   | -131.2943                       |
| MP4(SDTQ)/aug-cc-pVTZ        | -208.8550659 | -208.8357632 | -209.0565876 | 11.4259                    | 139.2249                   | -127.7990                       |
| QCISD(T)/cc-pVDZ             | -208.5915661 | -208.5843397 | -208.8098404 | 3.8479                     | 142.1593                   | -138.3114                       |
| QCISD(T)/aug-cc-pVDZ         | -208.6458403 | -208.6375966 | -208.8518604 | 4.4863                     | 135.1080                   | -130.6218                       |
| QCISD(T)/cc-pVTZ             | -208.8236503 | -208.8153371 | -209.0307763 | 4.5299                     | 135.8456                   | -131.3158                       |
| QCISD(T)/aug-cc-pVTZ         |              |              | -209.0500510 |                            |                            |                                 |
| CCSD(T)/cc-pVDZ              | -208.5900516 | -208.5829576 | -208.8093426 | 3.7648                     | 142.7142                   | -138.9494                       |
| CCSD(T)/aug-cc-pVDZ          | -208.6441067 | -208.6359908 | -208.8513096 | 4.4061                     | 135.7701                   | -131.3640                       |
| CCSD(T)/cc-pVTZ              | -208.8217596 | -208.8135499 | -209.0300555 | 4.4649                     | 136.5148                   | -132.0499                       |
| CCSD(T)/aug-cc-pVTZ          |              |              | -209.0493049 |                            |                            |                                 |
| $d\varepsilon_{ZPE}$         | 4.3845       | 3.6978       | 3.0423       |                            |                            | -1.3422                         |
| MP2/6-31G(d)                 | -208.5229701 | -208.5091477 | -208.7506130 | 7.9671                     | 152.1963                   | -144.2292                       |
| MP2/6-31++G(d,p)             | -208.5464668 | -208.5273840 | -208.7696058 | 11.2681                    | 152.6710                   | -141.4030                       |
| MP2/6-311++G(d,p)            | -208.6808513 | -208.6663592 | -208.9169090 | 8.3874                     | 157.8969                   | -149.5096                       |
| MP2/6-311++G(df,pd)          | -208.7410055 | -208.7244270 | -208.9683369 | 9.6966                     | 153.7303                   | -144.0338                       |
| MP2/6-311++G(3df,3pd)        | -208.8065405 | -208.7885230 | -209.0254932 | 10.5996                    | 149.3756                   | -138.7761                       |
| MP4(SDTQ)/6-31G(d)           | -208.5741141 | -208.5523847 | -208.7791967 | 12.9288                    | 143.0012                   | -130.0724                       |
| MP4(SDTQ)/6-31++G(d,p)       | -208.5913021 | -208.5720557 | -208.7990214 | 11.3707                    | 143.0977                   | -131.7270                       |
| MP4(SDTQ)/6-311++G(d,p)      | -208.7287835 | -208.7138889 | -208.9492587 | 8.6399                     | 148.3713                   | -139.7314                       |
| MP4(SDTQ)/6-311++G(df,pd)    | -208.7925163 | -208.7756336 | -209.0039361 | 9.8875                     | 143.9365                   | -134.0491                       |
| MP4(SDTQ)/6-311++G(3df,3pd)  | -208.8608898 | -208.8425388 | -209.0653474 | 10.8089                    | 140.4891                   | -129.6802                       |
| QCISD(T)/6-31G(d)            | -208.5693075 | -208.5590679 | -208.7752195 | 5.7189                     | 136.3117                   | -130.5929                       |
| QCISD(T)/6-31++G(d,p)        | -208.5855687 | -208.5780340 | -208.7947996 | 4.0215                     | 136.6970                   | -132.6755                       |
| QCISD(T)/6-311++G(d,p)       | -208.7237157 | -208.7206054 | -208.9436550 | 1.2452                     | 140.6403                   | -139.3952                       |
| QCISD(T)/6-311++G(df,pd)     | -208.7869143 | -208.7818969 | -208.9978573 | 2.4419                     | 136.1918                   | -133.7499                       |
| CCSD(T)/6-31G(d)             | -208.5677199 | -208.5575821 | -208.7746424 | 5.6550                     | 136.8820                   | -131.2270                       |
| CCSD(T)/6-31++G(d,p)         | -208.5838115 | -208.5763930 | -208.7941390 | 3.9486                     | 137.3122                   | -133.3637                       |
| CCSD(T)/6-311++G(d,p)        | -208.7217413 | -208.7187315 | -208.9428752 | 1.1821                     | 141.3269                   | -140.1448                       |
| CCSD(T)/6-311++G(df,pd)      | -208.7849909 | -208.7800652 | -208.9971292 | 2.3844                     | 136.8843                   | -134.5000                       |
| $d\varepsilon_{ZPE}$         | 4.3788       | 3.6722       | 2.9976       |                            |                            | -1.3812                         |
| $\Delta_f H^0(\text{exp})^1$ | 146.344      |              | 18.470       |                            |                            | -127.874                        |

TABLE V: Total electronic energies(hartree), forward barrier( $V_f + d\varepsilon_{ZPE}$ ), reverse barrier( $V_r + d\varepsilon_{ZPE}$ ), and enthalpy with ZPE correction( $\Delta H + d\varepsilon_{ZPE}$ ) and experimental heat of reaction ( $\Delta_f H^0(\text{exp})$ ) values, given in kcal mol<sup>-1</sup>, using Dunning basis set for reactant, product and TS for NF+N=N<sub>2</sub>+F reaction.

|                              | <i>NF + N</i> | <i>TS</i>    | <i>N<sub>2</sub> + F</i> | $V_d + d\varepsilon_{ZPE}$ | $V_r + d\varepsilon_{ZPE}$ | $\Delta H + d\varepsilon_{ZPE}$ |
|------------------------------|---------------|--------------|--------------------------|----------------------------|----------------------------|---------------------------------|
| MP2/cc-pVDZ                  | -208.5473953  | -208.5395302 | -208.7849231             | 5.2284                     | 152.8801                   | -147.6517                       |
| MP2/aug-cc-pVDZ              | -208.5885597  | -208.5832464 | -208.8230135             | 3.6272                     | 149.3499                   | -145.7227                       |
| MP2/cc-pVTZ                  | -208.7518279  | -208.7474655 | -208.9998415             | 3.0305                     | 157.2621                   | -154.2316                       |
| MP2/aug-cc-pVTZ              | -208.7681995  | -208.7666308 | -209.0182104             | 1.2774                     | 156.7623                   | -155.4849                       |
| MP4(SDQ)/cc-pVDZ             | -208.5793082  | -208.5731020 | -208.7971118             | 4.1875                     | 139.4620                   | -135.2746                       |
| MP4(SDQ)/aug-cc-pVDZ         | -208.6222228  | -208.6184019 | -208.8359423             | 2.6907                     | 135.4024                   | -132.7117                       |
| MP4(SDQ)/cc-pVTZ             | -208.7813769  | -208.7782546 | -209.0090221             | 2.2523                     | 143.7025                   | -141.4503                       |
| MP4(SDQ)/aug-cc-pVTZ         | -208.7973493  | -208.7972766 | -209.0266262             | 0.3386                     | 142.8128                   | -142.4742                       |
| MP4(SDTQ)/cc-pVDZ            | -208.5868588  | -208.5816755 | -208.8135452             | 3.5456                     | 144.3942                   | -140.8486                       |
| MP4(SDTQ)/aug-cc-pVDZ        | -208.6332439  | -208.6308825 | -208.8555815             | 1.7748                     | 139.8945                   | -138.1197                       |
| MP4(SDTQ)/cc-pVTZ            | -208.7976301  | -208.7962060 | -209.0372541             | 1.1866                     | 150.1537                   | -148.9671                       |
| MP4(SDTQ)/aug-cc-pVTZ        | -208.8153171  | -208.8171719 | -209.0565876             | -0.8709                    | 149.1294                   | -150.0003                       |
| QCISD/cc-pVDZ                | -208.5825694  | -208.5839682 | -208.7967257             | -0.5848                    | 132.4011                   | -132.9858                       |
| QCISD/aug-cc-pVDZ            | -208.6257208  | -208.6298276 | -208.8358684             | -2.2841                    | 128.1863                   | -130.4703                       |
| QCISD/cc-pVTZ                | -208.7839081  | -208.7881518 | -209.0078864             | -2.3700                    | 136.7793                   | -139.1492                       |
| QCISD/aug-cc-pVTZ            | -208.7999687  | -208.7999687 | -209.0256839             | -2.3700                    | 136.7793                   | -139.1492                       |
| QCISD(T)/cc-pVDZ             | -208.5886346  | -208.5947290 | -208.8098404             | -3.5313                    | 133.8782                   | -137.4095                       |
| QCISD(T)/aug-cc-pVDZ         | -208.6349089  | -208.6443949 | -208.8518604             | -5.6596                    | 129.0803                   | -134.7399                       |
| QCISD(T)/cc-pVTZ             | -208.7988996  | -208.8090522 | -209.0307763             | -6.0778                    | 138.0277                   | -144.1056                       |
| QCISD(T)/aug-cc-pVTZ         | -208.8164346  | -208.8164346 | -209.0500510             | -6.0778                    | 138.0277                   | -144.1056                       |
| CCSD/cc-pVDZ                 | -208.5802623  | -208.5816592 | -208.7954798             | -0.5836                    | 133.0682                   | -133.6518                       |
| CCSD/aug-cc-pVDZ             | -208.6229551  | -208.6269505 | -208.8343841             | -2.2141                    | 129.0603                   | -131.2744                       |
| CCSD/cc-pVTZ                 | -208.7814880  | -208.7856447 | -209.0062699             | -2.3154                    | 137.3381                   | -139.6535                       |
| CCSD/aug-cc-pVTZ             | -208.7973815  | -208.7973815 | -209.0239959             | -2.3154                    | 137.3381                   | -139.6535                       |
| CCSD(T)/cc-pVDZ              | -208.5877693  | -208.5936903 | -208.8093426             | -3.4225                    | 134.2176                   | -137.6401                       |
| CCSD(T)/aug-cc-pVDZ          | -208.6338548  | -208.6430859 | -208.8513096             | -5.4996                    | 129.5561                   | -135.0557                       |
| CCSD(T)/cc-pVTZ              | -208.7977878  | -208.8076632 | -209.0300555             | -5.9039                    | 138.4470                   | -144.3509                       |
| CCSD(T)/aug-cc-pVTZ          | -208.8152480  | -208.8152480 | -209.0493049             | -5.9039                    | 138.4470                   | -144.3509                       |
| $d\varepsilon_{ZPE}$         | 1.6430        | 1.9360       | 3.0423                   |                            |                            | 1.3993                          |
| $\Delta_f H^0(\text{exp})^1$ | 168.130       |              | 18.470                   |                            |                            | -149.660                        |

TABLE VI: Total electronic energies(hartree), forward barrier( $V_f + d\varepsilon_{ZPE}$ ), reverse barrier( $V_r + d\varepsilon_{ZPE}$ ), and enthalpy with ZPE correction( $\Delta H + d\varepsilon_{ZPE}$ ) and experimental heat of reaction ( $\Delta_f H^0(\text{exp})$ ) values, given in kcal mol<sup>-1</sup>, using Pople basis set for reactant, product and TS for NF+N=N<sub>2</sub>+F reaction.

|                              | <i>NF + N</i> | <i>TS</i>    | <i>N<sub>2</sub> + F</i> | $V_d + d\varepsilon_{ZPE}$ | $V_r + d\varepsilon_{ZPE}$ | $\Delta H + d\varepsilon_{ZPE}$ |
|------------------------------|---------------|--------------|--------------------------|----------------------------|----------------------------|---------------------------------|
| MP2/6-31G(d)                 | -208.5130611  | -208.5104723 | -208.7506130             | 1.9073                     | 149.6217                   | -147.7145                       |
| MP2/6-31++G(d.p)             | -208.5338765  | -208.5267752 | -208.7696058             | 4.7389                     | 151.3097                   | -146.5708                       |
| MP2/6-311++G(d.p)            | -208.6740535  | -208.6659549 | -208.9169090             | 5.3648                     | 156.4072                   | -151.0425                       |
| MP2/6-311++G(df,pd)          | -208.7219592  | -208.7156711 | -208.9683369             | 4.2287                     | 157.4813                   | -153.2527                       |
| MP2/6-311++G(3df,3pd)        | -208.7782746  | -208.7740323 | -209.0254932             | 2.9449                     | 156.7253                   | -153.7804                       |
| MP4(SDQ)/6-31G(d)            | -208.5496953  | -208.5437603 | -208.7611814             | 4.0071                     | 135.3650                   | -131.3579                       |
| MP4(SDQ)/6-31++G(d.p)        | -208.5655928  | -208.5601613 | -208.7805905             | 3.6911                     | 137.2526                   | -133.5615                       |
| MP4(SDQ)/6-311++G(d.p)       | -208.7049647  | -208.6980240 | -208.9269772             | 4.6382                     | 142.6015                   | -137.9633                       |
| MP4(SDQ)/6-311++G(df,pd)     | -208.7534273  | -208.7489807 | -208.9793326             | 3.0731                     | 143.4792                   | -140.4061                       |
| MP4(SDQ)/6-311++G(3df,3pd)   | -208.8096826  | -208.8066690 | -209.0360375             | 2.1739                     | 142.8621                   | -140.6882                       |
| MP4(SDTQ)/6-31G(d)           | -208.5578274  | -208.5529331 | -208.7791967             | 3.3540                     | 140.9137                   | -137.5597                       |
| MP4(SDTQ)/6-31++G(d.p)       | -208.5748318  | -208.5705964 | -208.7990214             | 2.9406                     | 142.2700                   | -139.3295                       |
| MP4(SDTQ)/6-311++G(d.p)      | -208.7163021  | -208.7111632 | -208.9492587             | 3.5075                     | 148.3383                   | -144.8309                       |
| MP4(SDTQ)/6-311++G(df,pd)    | -208.7665216  | -208.7634858 | -209.0039361             | 2.1878                     | 149.8160                   | -147.6282                       |
| MP4(SDTQ)/6-311++G(3df,3pd)  | -208.8270539  | -208.8257690 | -209.0653474             | 1.0891                     | 149.2689                   | -148.1798                       |
| QCISD/6-31G(d)               | -208.5531883  | -208.5543882 | -208.7616226             | -0.4701                    | 128.9727                   | -129.4429                       |
| QCISD/6-31++G(d.p)           | -208.5690225  | -208.5709801 | -208.7805227             | -0.9456                    | 130.4211                   | -131.3668                       |
| QCISD/6-311++G(d.p)          | -208.7084735  | -208.7086445 | -208.9262514             | 0.1755                     | 135.4816                   | -135.3061                       |
| QCISD/6-311++G(df,pd)        | -208.7562897  | -208.7589942 | -208.9783891             | -1.4143                    | 136.6035                   | -138.0179                       |
| QCISD(T)/6-31G(d)            | -208.5591564  | -208.5650043 | -208.7752195             | -3.3868                    | 130.8432                   | -134.2300                       |
| QCISD(T)/6-31++G(d.p)        | -208.5756931  | -208.5825870 | -208.7947996             | -4.0432                    | 132.0966                   | -136.1398                       |
| QCISD(T)/6-311++G(d.p)       | -208.7176584  | -208.7232464 | -208.9436550             | -3.2237                    | 137.2396                   | -140.4634                       |
| QCISD(T)/6-311++G(df,pd)     | -208.7678391  | -208.7759745 | -208.9978573             | -4.8222                    | 138.1647                   | -142.9870                       |
| CCSD/6-31G(d)                | -208.5502674  | -208.5515313 | -208.7601402             | -0.5103                    | 129.8352                   | -130.3456                       |
| CCSD/6-31++G(d.p)            | -208.5658074  | -208.5677571 | -208.7787244             | -0.9406                    | 131.3151                   | -132.2558                       |
| CCSD/6-311++G(d.p)           | -208.7054011  | -208.7059431 | -208.9244951             | -0.0573                    | 136.0746                   | -136.1320                       |
| CCSD/6-311++G(df,pd)         | -208.7536899  | -208.7563720 | -208.9767173             | -1.4002                    | 137.1999                   | -138.6002                       |
| CCSD(T)/6-31G(d)             | -208.5581737  | -208.5638684 | -208.7746424             | -3.2907                    | 131.1938                   | -134.4846                       |
| CCSD(T)/6-31++G(d.p)         | -208.5745948  | -208.5812883 | -208.7941390             | -3.9174                    | 132.4970                   | -136.4145                       |
| CCSD(T)/6-311++G(d.p)        | -208.7164833  | -208.7218504 | -208.9428752             | -3.0851                    | 137.6263                   | -140.7115                       |
| CCSD(T)/6-311++G(df,pd)      | -208.7666743  | -208.7746066 | -208.9971292             | -4.6948                    | 138.5662                   | -143.2610                       |
| $d\varepsilon_{ZPE}$         | 1.6460        | 1.9288       | 2.9976                   |                            |                            | 1.3516                          |
| $\Delta_f H^0(\text{exp})^1$ | 168.130       |              | 18.470                   |                            |                            | -149.660                        |

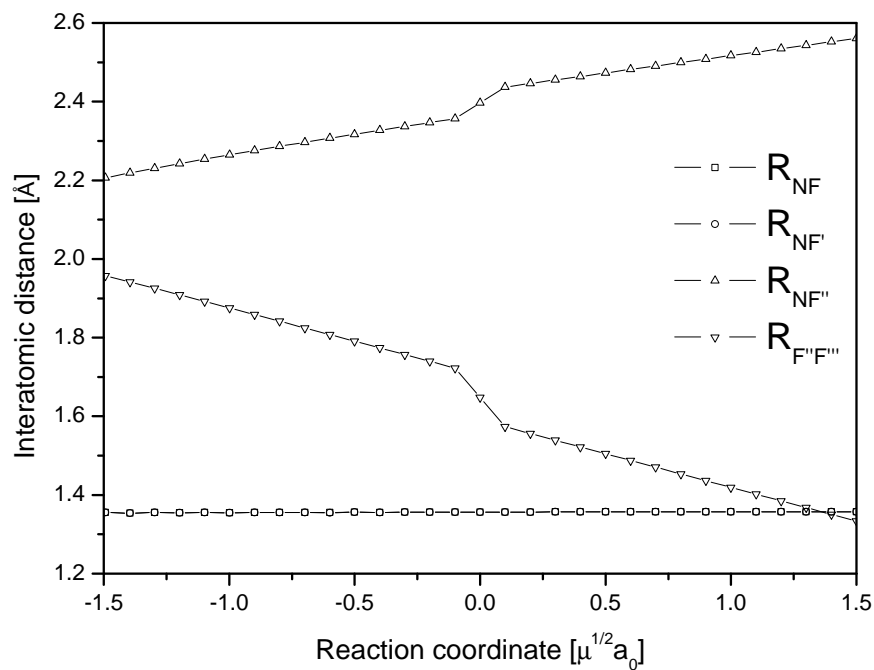

FIG. 1: IRC of the abstraction channel  $\text{NF}_3 + \text{F} = \text{NF}_2 + \text{F}_2$ .

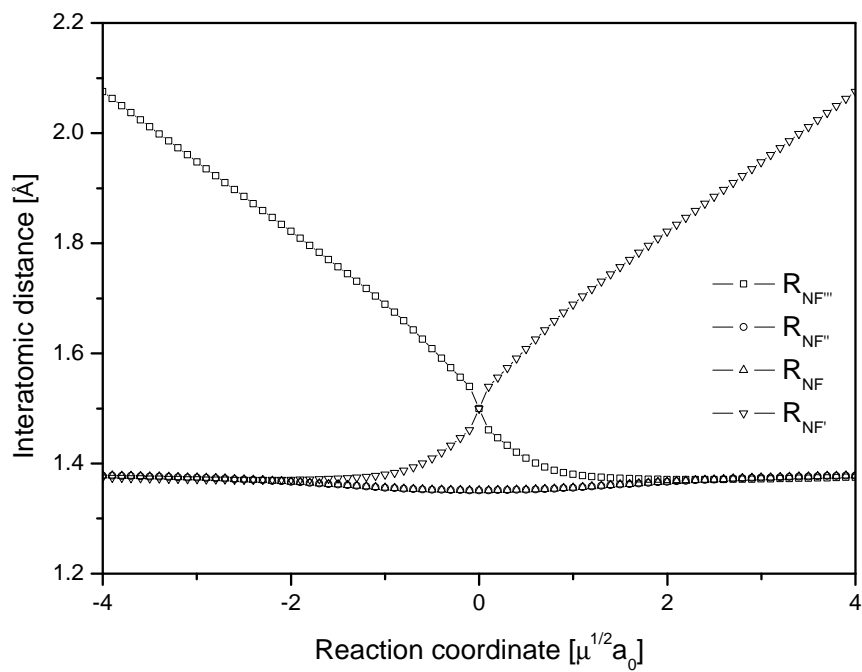

FIG. 2: IRC of the exchange channel  $\text{NF}_3 + \text{F} = \text{NF}_3 + \text{F}$ .

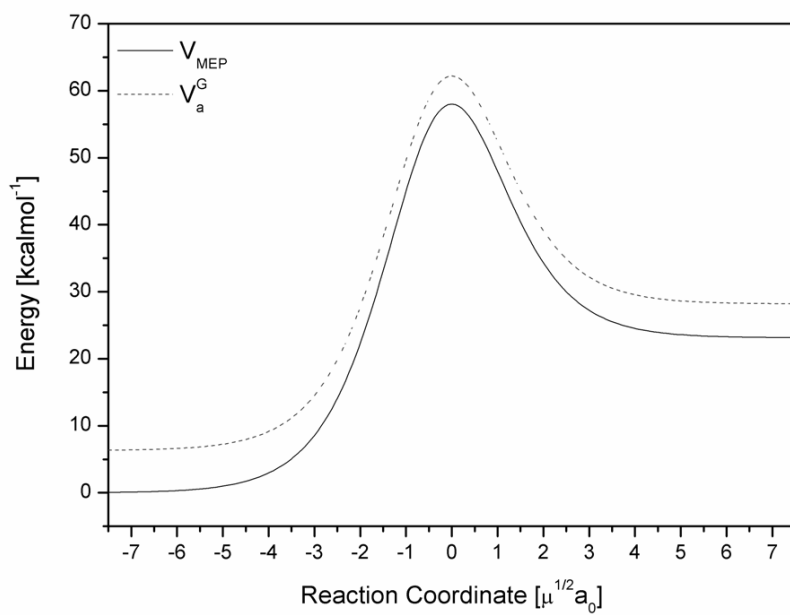

FIG. 3: MEP and  $V_a^G$  as a function of reaction coordinate for the  $\text{NF}_3 + \text{F} = \text{NF}_2 + \text{F}_2$  abstraction reaction.

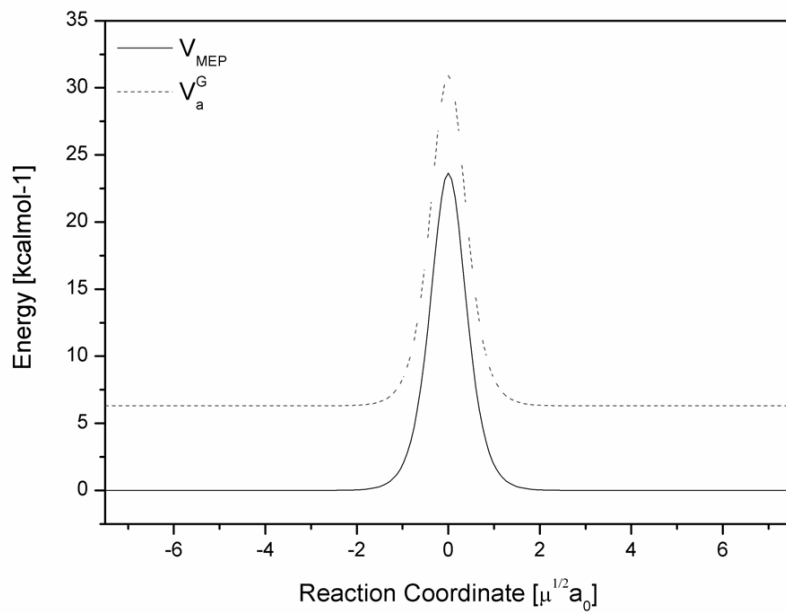

FIG. 4: MEP and  $V_a^G$  as a function of reaction coordinate for  $\text{NF}_3 + \text{F} = \text{NF}_3 + \text{F}$  exchange reaction.



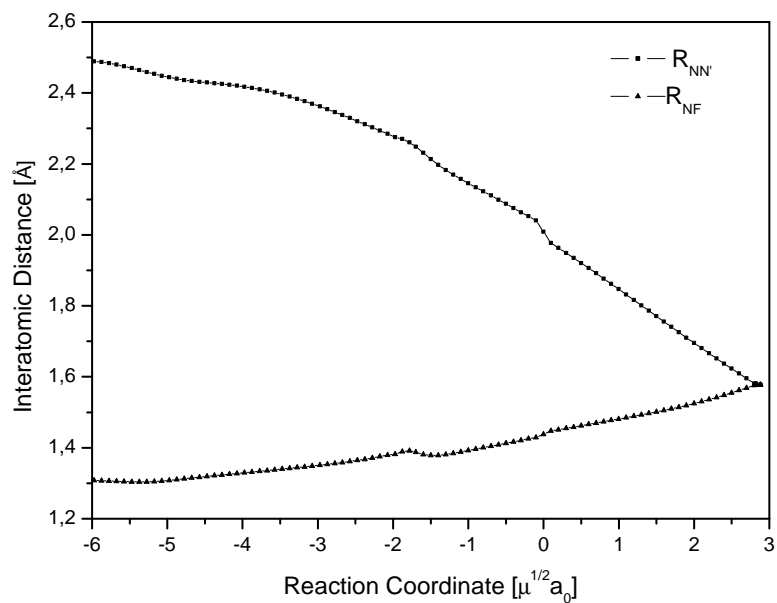

FIG. 5: IRC of the unimolecular channel  $N_2F = N_2 + F$ .

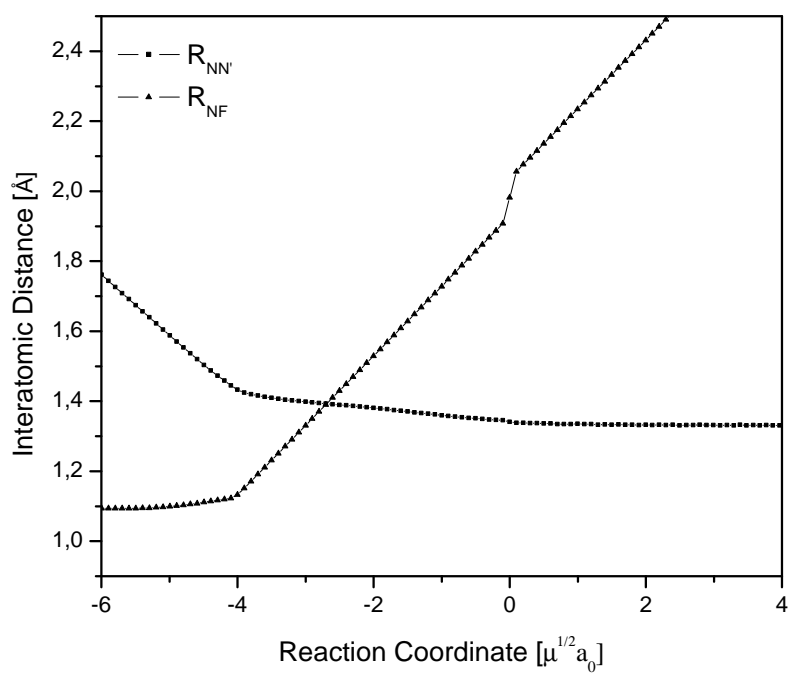

FIG. 6: IRC of the abstraction channel  $NF + N = N_2 + F$ .

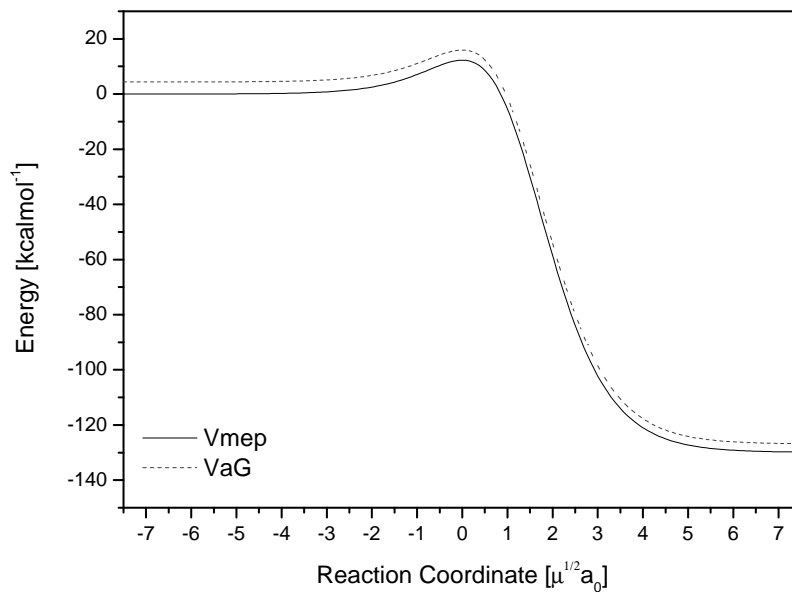

FIG. 7: MEP and  $V_a^G$  as a function of reaction coordinate for the  $N_2F = N_2 + F$  unimolecular reaction.

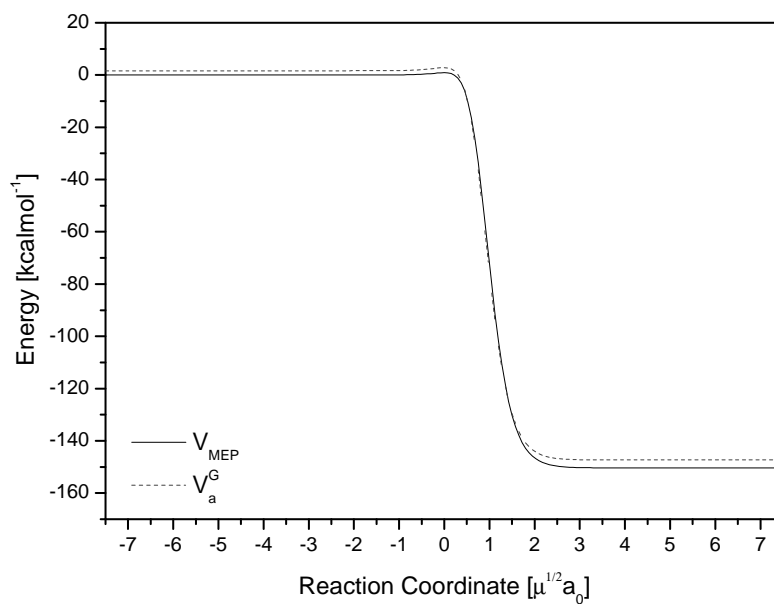

FIG. 8: MEP and  $V_a^G$  as a function of reaction coordinate for the  $NF + N = N_2 + F$  abstraction reaction.
